# Supplementary material
Source: publisher site journal article supplement (https://www.dovepress.com/article/377559)
Supplement: Supplementary file 1 [file get_supplementary_file.php]

**SUPPLEMENTARY MATERIALS**  
**Needs Assessment for the Establishment of Master's degree**  
**programs in Respiratory Care in the Kingdom of Saudi Arabia**

Table S1. Needs assessment and RTs' level of interest for establishing a master degree in RC in Saudi Arabia.

| Level of agreement among RTs Respondents (n= 504)                                                                                                                                 | SD         | D           | N           | A            | SA           |
|-----------------------------------------------------------------------------------------------------------------------------------------------------------------------------------|------------|-------------|-------------|--------------|--------------|
| <b>Needs Assessment</b>                                                                                                                                                           |            |             |             |              |              |
| The current levels of training in Respiratory Care need more advancement to meet the needs of the society at the present time.                                                    | 3<br>(1%)  | 17<br>(3%)  | 52<br>(10%) | 157<br>(31%) | 275<br>(55%) |
| The training and education that you received were not enough to manage all levels of Respiratory Care (including clinical, educational and research practices).                   | 32<br>(6%) | 79<br>(16%) | 95<br>(19%) | 146<br>(29%) | 152<br>(30%) |
| In the future, the levels of current Respiratory Care education and training need to be advanced to meet the needs of the society.                                                | 7<br>(1%)  | 11<br>(2%)  | 49<br>(10%) | 167<br>(33%) | 270<br>(54%) |
| The level of education and training of Respiratory Care Profession should be advanced to include a graduate degree (Masters of Respiratory Care Science)                          | 14<br>(3%) | 22<br>(4%)  | 46<br>(9%)  | 138<br>(27%) | 284<br>(56%) |
| A master's degree in Respiratory Care would advance the levels of knowledge of Respiratory Therapists                                                                             | 13<br>(3%) | 12<br>(2%)  | 60<br>(12%) | 141<br>(28%) | 278<br>(55%) |
| A master's degree in Respiratory Care would increase the levels of technical, clinical and research skills of Respiratory therapists                                              | 12<br>(2%) | 14<br>(3%)  | 48<br>(10%) | 139<br>(28%) | 291<br>(57%) |
| A master's degree in Respiratory Care would increase the levels of satisfaction of Respiratory Therapists                                                                         | 14<br>(3%) | 12<br>(2%)  | 72<br>(14%) | 129<br>(26%) | 277<br>(55%) |
| There is a need in my organization for Respiratory Therapists with the knowledge, training and skills acquired by those who complete a Master degree in Respiratory Care program? | 19<br>(4%) | 31<br>(6%)  | 79<br>(16%) | 152<br>(30%) | 223<br>(44%) |
| <b>Mean N (%)</b>                                                                                                                                                                 | 14<br>(3%) | 25<br>(5%)  | 63<br>(12%) | 146<br>(29%) | 256<br>(51%) |
| <b>Level of interest in a Master degree in Respiratory Care</b>                                                                                                                   |            |             |             |              |              |
| I will apply for admission to the Master Degree program in Respiratory Care if it is launched within the next 1-3 years.                                                          | 20<br>(4%) | 13<br>(2%)  | 61<br>(12%) | 104<br>(21%) | 306<br>(61%) |
| I will help others applying for admission to the Master Degree program in Respiratory Care if it is launched within the next 1-3 years.                                           | 8<br>(2%)  | 8<br>(2%)   | 58<br>(11%) | 135<br>(27%) | 295<br>(58%) |
| Do you believe that the Master Degree in respiratory Care will advance your or others career opportunities?                                                                       | 13<br>(3%) | 27<br>(5%)  | 51<br>(10%) | 120<br>(24%) | 293<br>(58%) |
| Would you recommend to others that they consider enrolling in the proposed Master Degree program?                                                                                 | 9<br>(2%)  | 16<br>(3%)  | 65<br>(13%) | 137<br>(27%) | 277<br>(55%) |
| <b>Mean N (%)</b>                                                                                                                                                                 | 12<br>(2%) | 16<br>(3%)  | 59<br>(12%) | 124<br>(25%) | 293<br>(58%) |

## SUPPLEMENTARY MATERIALS

Table S2. Needs assessment and RTs leaders' level of interest for establishing a master degree in RC in Saudi Arabia.

| Level of agreement among RTs HEADs Respondents (n= 138)                                                                                                                           | SD         | D           | N           | A           | SA          |
|-----------------------------------------------------------------------------------------------------------------------------------------------------------------------------------|------------|-------------|-------------|-------------|-------------|
| <b>Needs Assessment (8 questions)</b>                                                                                                                                             |            |             |             |             |             |
| The current levels of training in Respiratory Care need more advancement to meet the needs of the society at the present time.                                                    | 4<br>(3%)  | 3<br>(2%)   | 9<br>(6%)   | 45<br>(33%) | 77<br>(56%) |
| The training and education that you received were not enough to manage all levels of Respiratory Care (including clinical, educational and research practices).                   | 13<br>(9%) | 26<br>(19%) | 25<br>(18%) | 37<br>(27%) | 37<br>(27%) |
| In the future, the levels of current Respiratory Care education and training need to be advanced to meet the needs of the society.                                                | 2<br>(1%)  | 2<br>(1%)   | 10<br>(7%)  | 58<br>(42%) | 66<br>(48%) |
| The level of education and training of Respiratory Care Profession should be advanced to include a graduate degree (Masters of Respiratory Care Science)                          | 2<br>(1%)  | 6<br>(4%)   | 8<br>(6%)   | 51<br>(37%) | 71<br>(51%) |
| A master's degree in Respiratory Care would advance the levels of knowledge of Respiratory Therapists                                                                             | 3<br>(2%)  | 4<br>(3%)   | 8<br>(6%)   | 45<br>(33%) | 78<br>(57%) |
| A master's degree in Respiratory Care would increase the levels of technical, clinical and research skills of Respiratory therapists                                              | 2<br>(1%)  | 4<br>(3%)   | 8<br>(6%)   | 43<br>(31%) | 81<br>(59%) |
| A master's degree in Respiratory Care would increase the levels of satisfaction of Respiratory Therapists                                                                         | 2<br>(1%)  | 3<br>(2%)   | 14<br>(10%) | 39<br>(28%) | 80<br>(58%) |
| There is a need in my organization for Respiratory Therapists with the knowledge, training and skills acquired by those who complete a Master degree in Respiratory Care program? | 5<br>(4%)  | 4<br>(3%)   | 12<br>(9%)  | 47<br>(34%) | 70<br>(51%) |
| <b>Mean N (%)</b>                                                                                                                                                                 | 4<br>(3%)  | 7<br>(5%)   | 12<br>(9%)  | 46<br>(33%) | 70<br>(51%) |
| <b>Level of interest in a Master degree in Respiratory Care</b>                                                                                                                   |            |             |             |             |             |
| I will apply for admission to the Master Degree program in Respiratory Care if it is launched within the next 1-3 years.                                                          | 9<br>(6%)  | 7<br>(5%)   | 17<br>(12%) | 24<br>(17%) | 81<br>(59%) |
| I will help others applying for admission to the Master Degree program in Respiratory Care if it is launched within the next 1-3 years.                                           | 2<br>(1%)  | 1<br>(1%)   | 8<br>(6%)   | 43<br>(31%) | 84<br>(61%) |
| Do you believe that the Master Degree in respiratory Care will advance your or others career opportunities?                                                                       | 3<br>(2%)  | 4<br>(3%)   | 14<br>(10%) | 39<br>(28%) | 78<br>(57%) |
| Would you recommend to others that they consider enrolling in the proposed Master Degree program?                                                                                 | 4<br>(3%)  | 2<br>(1%)   | 12<br>(9%)  | 41<br>(30%) | 79<br>(57%) |
| <b>Mean N (%)</b>                                                                                                                                                                 | 5<br>(4%)  | 4<br>(3%)   | 13<br>(9%)  | 37<br>(27%) | 81<br>(59%) |

## SUPPLEMENTARY MATERIALS

Table S3. Needs assessment and academic respondents' level of interest for establishing a master degree in RC in Saudi Arabia.

| Level of agreement among Academic Respondents (n= 61)                                                                                                                             | SD         | D         | N           | A           | SA          |
|-----------------------------------------------------------------------------------------------------------------------------------------------------------------------------------|------------|-----------|-------------|-------------|-------------|
| <b>Needs Assessment</b>                                                                                                                                                           |            |           |             |             |             |
| The current levels of training in Respiratory Care need more advancement to meet the needs of the society at the present time.                                                    | 3<br>(5%)  | 0         | 6<br>(10%)  | 14<br>(23%) | 38<br>(62%) |
| The training and education that you received were not enough to manage all levels of Respiratory Care (including clinical, educational and research practices).                   | 3<br>(5%)  | 5<br>(8%) | 9<br>(15%)  | 22<br>(36%) | 22<br>(36%) |
| In the future, the levels of current Respiratory Care education and training need to be advanced to meet the needs of the society.                                                | 2<br>(3%)  | 0         | 4<br>(7%)   | 21<br>(34%) | 34<br>(56%) |
| The level of education and training of Respiratory Care Profession should be advanced to include a graduate degree (Masters of Respiratory Care Science)                          | 2<br>(3%)  | 0         | 8<br>(13%)  | 11<br>(18%) | 40<br>(66%) |
| A master's degree in Respiratory Care would advance the levels of knowledge of Respiratory Therapists                                                                             | 2<br>(2%)  | 0         | 9<br>(15%)  | 13<br>(21%) | 37<br>(61%) |
| A master's degree in Respiratory Care would increase the levels of technical, clinical and research skills of Respiratory therapists                                              | 2<br>(3%)  | 1<br>(2%) | 10<br>(16%) | 11<br>(18%) | 37<br>(61%) |
| A master's degree in Respiratory Care would increase the levels of satisfaction of Respiratory Therapists                                                                         | 2<br>(3%)  | 2<br>(3%) | 9<br>(15%)  | 17<br>(28%) | 31<br>(51%) |
| There is a need in my organization for Respiratory Therapists with the knowledge, training and skills acquired by those who complete a Master degree in Respiratory Care program? | 2<br>(3%)  | 1<br>(2%) | 7<br>(12%)  | 16<br>(26%) | 35<br>(57%) |
| <b>Mean N (%)</b>                                                                                                                                                                 | 2<br>(3%)  | 1<br>(2%) | 8<br>(13%)  | 16<br>(26%) | 34<br>(56%) |
| <b>Level of interest in a Master degree in Respiratory Care</b>                                                                                                                   |            |           |             |             |             |
| I will apply for admission to the Master Degree program in Respiratory Care if it is launched within the next 1-3 years.                                                          | 6<br>(10%) | 3<br>(5%) | 16<br>(26%) | 8<br>(13%)  | 28<br>(46%) |
| I will help others applying for admission to the Master Degree program in Respiratory Care if it is launched within the next 1-3 years.                                           | 2<br>(3%)  | 0         | 6<br>(10%)  | 15<br>(25%) | 38<br>(62%) |
| Do you believe that the Master Degree in respiratory Care will advance your or others career opportunities?                                                                       | 2<br>(3%)  | 0         | 8<br>(13%)  | 17<br>(28%) | 34<br>(56%) |
| Would you recommend to others that they consider enrolling in the proposed Master Degree program?                                                                                 | 2<br>(3%)  | 0         | 6<br>(10%)  | 19<br>(31%) | 34<br>(56%) |
| <b>Mean N (%)</b>                                                                                                                                                                 | 3<br>(5%)  | 1<br>(2%) | 9<br>(15%)  | 15<br>(25%) | 34<br>(56%) |

## SUPPLEMENTARY MATERIALS

Table S4. Needs assessment and students' level of interest for establishing a master degree in RC in Saudi Arabia.

| Level of agreement among Students Respondents (n= 547)                                                                                                                            | SD          | D           | N            | A            | SA           |
|-----------------------------------------------------------------------------------------------------------------------------------------------------------------------------------|-------------|-------------|--------------|--------------|--------------|
| <b>Needs Assessment</b>                                                                                                                                                           |             |             |              |              |              |
| The current levels of training in Respiratory Care need more advancement to meet the needs of the society at the present time.                                                    | 2<br>(0.4%) | 12<br>(2%)  | 45<br>(8%)   | 164<br>(30%) | 324<br>(59%) |
| The training and education that you received were not enough to manage all levels of Respiratory Care (including clinical, educational and research practices).                   | 17<br>(3%)  | 80<br>(15%) | 131<br>(24%) | 152<br>(28%) | 167<br>(30%) |
| In the future, the levels of current Respiratory Care education and training need to be advanced to meet the needs of the society.                                                | 0           | 6<br>(1%)   | 44<br>(8%)   | 169<br>(31%) | 328<br>(60%) |
| The level of education and training of Respiratory Care Profession should be advanced to include a graduate degree (Masters of Respiratory Care Science)                          | 0           | 9<br>(2%)   | 38<br>(7%)   | 130<br>(23%) | 370<br>(68%) |
| A master's degree in Respiratory Care would advance the levels of knowledge of Respiratory Therapists                                                                             | 0           | 7<br>(1%)   | 24<br>(5%)   | 115<br>(21%) | 401<br>(73%) |
| A master's degree in Respiratory Care would increase the levels of technical, clinical and research skills of Respiratory therapists                                              | 0           | 4<br>(1%)   | 32<br>(6%)   | 119<br>(22%) | 392<br>(71%) |
| A master's degree in Respiratory Care would increase the levels of satisfaction of Respiratory Therapists                                                                         | 0           | 7<br>(1%)   | 31<br>(6%)   | 146<br>(27%) | 363<br>(66%) |
| There is a need in my organization for Respiratory Therapists with the knowledge, training and skills acquired by those who complete a Master degree in Respiratory Care program? | 4<br>(1%)   | 14<br>(2%)  | 84<br>(15%)  | 162<br>(30%) | 283<br>(52%) |
| <b>Mean N (%)</b>                                                                                                                                                                 | 3<br>(0.5%) | 17<br>(3%)  | 54<br>(10%)  | 145<br>(27%) | 329<br>(60%) |
| <b>Level of interest in a Master degree in Respiratory Care</b>                                                                                                                   |             |             |              |              |              |
| I will apply for admission to the Master Degree program in Respiratory Care if it is launched within the next 1-3 years.                                                          | 4<br>(1%)   | 11<br>(2%)  | 55<br>(10%)  | 118<br>(22%) | 359<br>(65%) |
| I will help others applying for admission to the Master Degree program in Respiratory Care if it is launched within the next 1-3 years.                                           | 0           | 3<br>(1%)   | 48<br>(9%)   | 145<br>(26%) | 351<br>(64%) |
| Do you believe that the Master Degree in respiratory Care will advance your or others career opportunities?                                                                       | 0           | 10<br>(2%)  | 32<br>(6%)   | 109<br>(20%) | 396<br>(72%) |
| Would you recommend to others that they consider enrolling in the proposed Master Degree program?                                                                                 | 3<br>(1%)   | 0           | 40<br>(7%)   | 145<br>(26%) | 359<br>(66%) |
| <b>Mean N (%)</b>                                                                                                                                                                 | 2<br>(0.4%) | 6<br>(1%)   | 44<br>(8%)   | 129<br>(23%) | 366<br>(67%) |
